# Supplementary material
Source: PubMed Central journal article supplement (PMC2914352)
Supplement: ced0028-0539-s01.pdf [file ced0028-0539-s01.pdf]

Appendix Table 1: The FAST-MAG Physician-Investigators, Coordinators and Research Assistants

| <b>Last Name</b> | <b>First Name</b> | <b>Hospital Site(s)</b>                                                                                                                       |
|------------------|-------------------|-----------------------------------------------------------------------------------------------------------------------------------------------|
| Abrahamian       | Fred              | Olive View-UCLA Medical Center, Sylmar, CA, Sylmar, CA<br>Henry Mayo Hospital, Newhall, CA, Newhall, CA;                                      |
| Abrahams         | Jeffrey           | Northridge Hospital, Northridge, CA Hospital, Los Angeles, CA                                                                                 |
| Agron            | Michael           | Hospital, Arcadia, CA Hosp. Arcadia, CA<br>Glendale Memorial Medical Center, Glendale, CA<br>Glendale Adventist, Medical Center, Glendale, CA |
| Akopov           | Serge             | Providence St. Joseph Medical Center, Burbank, CA                                                                                             |
| Alfred           | Gregory           | California Hospital Medical Center, Los Angeles, CA<br>Olympia Hosp., Los Angeles, CA                                                         |
| Alfred           | Gregory           | California Hospital Medical Center, Los Angeles, CA                                                                                           |
| Ali              | Latisha           | UCLA Medical Center, Los Angeles, CA                                                                                                          |
| Allen            | James             | West Hills Hospital, Los Angeles, CA Hospital,                                                                                                |
| Amin             | David             | Little Company of Mary Hospital, Torrance, CA                                                                                                 |
| Amos             | Edwin             | St. John's Hospital, Santa Monica, CA                                                                                                         |
| Anderson         | Thomas Leif       | Harbor-UCLA Medical Center, Los Angeles, CA                                                                                                   |
| Andersson        | Peter-Brian       | Encino Hospital, Encino CA<br>Providence Tarzana Medical Center, Tarzana, CA                                                                  |
| Anhalt           | Elisa             | Torrance Memorial Medical Center, Torrance, CA                                                                                                |
| Anis             | John              | Olympia Hosp., Los Angeles, CA<br>Henry Mayo Hospital, Newhall, CA                                                                            |
| Antelyes         | Roy               | Huntington Memorial Hospital, Pasadena, CA                                                                                                    |
| Aragona          | Jodi D            | Glendale Memorial Medical Center, Glendale, CA                                                                                                |
| Astudillo        | Teodoro           | San Dimas Community Hospital, San Dimas, CA                                                                                                   |
| Au               | Janet             | Olive View-UCLA Medical Center, Sylmar, CA                                                                                                    |
| Auerbach         | Frederick         | Antelope Valley Hospital, Lancaster, CA                                                                                                       |
| Azen             | Stan              | Mission Community Hospital, Panorama City, CA                                                                                                 |
| Baca             | Ralph             | Encino Hospital, Encino CA<br>Providence Tarzana Medical Center, Tarzana, CA                                                                  |
| Baldrige         | Bradford          | Little Company of Mary Hospital, Torrance, CA                                                                                                 |
| Balkian          | Garo              | Kaiser Permanente Hospital, Woodland Hills, CA                                                                                                |
| Balogh           | Mona              | Kaiser Permanente Hospital, Woodland Hills, CA                                                                                                |
| Banerji          | Sanjay            | Good Samaritan Hospital, Los Angeles, CA                                                                                                      |
| Bash             | Isaac             | St. John's Hospital, Santa Monica, CA                                                                                                         |
| Bastian          | Eileen            | West Hills Hospital, Los Angeles, CA                                                                                                          |
| Bautista         | Manuel            | White Memorial Hospital, Los Angeles, CA                                                                                                      |
| Beck             | Brian             | Presbyterian Intercommunity Hospital, Whittier, CA                                                                                            |
| Belafsky         | Melvin            | Providence St. Joseph Medical Center, Burbank, CA                                                                                             |
| Bell             | Mark              | Encino Hospital, Encino CA<br>Providence Tarzana Medical Center, Tarzana, CA                                                                  |
| Bennett          | Vincent           | LancasterCommunity Hospital, Lancaster, CA                                                                                                    |
| Berkenbile       | Leonard           | Verdugo Hills Hospital, Glendale, CA                                                                                                          |
| Biren            | Pamela            | Hollywood Presbyterian Hospital, Los Angeles, CA<br>Providence St. Joseph Medical Center, Burbank, CA                                         |
| Birnbaumer       | D                 | Harbor-UCLA Medical Center, Los Angeles, CA                                                                                                   |
| Blair            | Brant             | White Memorial Hospital, Los Angeles, CA                                                                                                      |
| Blum             | Michael           | White Memorial Hospital, Los Angeles, CA                                                                                                      |

|            |               |                                                         |
|------------|---------------|---------------------------------------------------------|
|            |               | Providence Holy Cross Hospital, Mission Hills, CA       |
| Bobo       | Charmaine     | Methodist Hospital, Arcadia, CA                         |
| Boettger   | Mark          | Pomona Valley Hospital Medical Center, Pomona, CA       |
|            |               | Antelope Valley Hospital, Lancaster Community Hospital, |
| Boyatt     | Patricia      | Lancaster, CA                                           |
| Brandes    | David         | Northridge Hospital, Northridge, CA                     |
| Brewster   | Gregory Scott | Encino Hospital, Encino CA                              |
|            |               | Providence Tarzana Medical Center, Tarzana, CA          |
| Brown      | Jay           | Providence Holy Cross Hospital, Mission Hills, CA       |
| Brown      | Mark          | Antelope Valley Hospital, Lancaster, CA                 |
| Brown      | Ralph William | St. Mary Medical Center, Long Beach, CA                 |
|            |               | Little Company of Mary Hospital, San Pedro, CA          |
| Bullias    | Bruce Alan    | Presbyterian Intercommunity Hospital, Whittier, CA      |
| Burbulys   | David         | Harbor-UCLA Medical Center, Los Angeles, CA             |
| Burden     | Billy         | Long Beach Memorial Hospital, Long Beach, CA            |
| Burke      | Gregory       | Pomona Valley Hospital Medical Center, Pomona, CA       |
| Burke      | James         | Methodist Hospital, Arcadia, CA                         |
| Bush       | Gregory       | Long Beach Memorial Hospital, Long Beach, CA            |
| Bush       | Walter        | Olympia Hosp., Los Angeles, CA                          |
| Cabasso    | Phillip       | Methodist Hospital, Arcadia, CA                         |
| Caira      | Loren         | West Hills Hospital, Los Angeles, CA                    |
| Calder     | Kirsten       | LAC+USC Medical Center, Los Angeles, CA                 |
| Canby      | Neil          | Encino Hospital, Encino CA                              |
|            |               | Providence Tarzana Medical Center, Tarzana, CA          |
| Candioty   | Victor        | St. John's Hospital, Santa Monica, CA                   |
| Carlisle   | Eric          | Encino Hospital, Encino CA                              |
|            |               | Providence Tarzana Medical Center, Tarzana, CA          |
| Carney     | Stephen       | Olympia Hosp., Los Angeles, CA                          |
| Carr       | Frederick Jay | Little Company of Mary Hospital, Torrance, CA           |
| Carrillo   | Andrea E      | San Dimas Community Hospital, San Dimas, CA             |
| Carrillo   | Martin        | Mission Community Hospital, Panorama City, CA           |
| Carruthers | Gail          | Long Beach Memorial Hospital, Long Beach, CA            |
| Cashatt    | Troy          | Hollywood Presbyterian Hospital, Los Angeles, CA        |
| Cervantes  | Jose Luis     | St. Francis Medical Center, Los Angeles, CA             |
| Chang      | Danny         | Sherman Oaks Hospital, Sherman Oaks, CA                 |
| Charfen    | Michelle      | Harbor-UCLA Medical Center, Los Angeles, CA             |
|            |               | Santa Monica-UCLA Medical Center, Sana Monica, CA       |
| Chavoshi   | Ziba          | Olympia Hosp., Los Angeles, CA                          |
| Chen       | Grace         | St. John's Hospital, Santa Monica, CA                   |
| Chen       | Hugo          | Kaiser Permanente Hospital, Woodland Hills, CA          |
| Chen       | Jennifer      | Verdugo Hills Hospital, Glendale, CA                    |
| Chenevert  | Martin        | Santa Monica-UCLA Medical Center, Sana Monica, CA       |
| Chin       | Steven        | Presbyterian Intercommunity Hospital, Whittier, CA      |
| Chon       | John          |                                                         |
| Cichon     | Patrick D.    | St. Mary Medical Center, Long Beach, CA                 |
|            |               | Little Company of Mary Hospital, San Pedro, CA          |
| Co         | Schenley      | Little Company of Mary Hospital, Torrance, CA           |
|            |               | Torrance Memorial Medical Center, Torrance, CA          |
| Coates     | Wendy C       | Harbor-UCLA Medical Center, Los Angeles, CA             |
| Coburn     | William       | Huntington Memorial Hospital, Pasadena, CA              |
| Cochrane   | Douglas       | Mission Community Hospital, Panorama City, CA           |

|            |              |                                                    |
|------------|--------------|----------------------------------------------------|
| Cohen      | Marc Richard | Little Company of Mary Hospital, Torrance, CA      |
| Cohenour   | Robert       | Encino Hospital, Encino CA                         |
|            |              | Providence Tarzana Medical Center, Tarzana, CA     |
|            |              | Northridge Hospital, Northridge, CA                |
| Cokely     | Harriet      | St. John's Hospital, Santa Monica, CA              |
| Cokely     | Harriet      | Santa Monica-UCLA Medical Center, Santa Monica, CA |
| Collier    | James        | Long Beach Memorial Hospital, Long Beach, CA       |
| Conneen    | Dennis       | Presbyterian Intercommunity Hospital, Whittier, CA |
| Conovaloff | Luke         | Marina Del Rey Hospital, Los Angeles, CA           |
| Conrad     | William      | Little Company of Mary Hospital, Torrance, CA      |
| Copeland   | Dane         | Presbyterian Intercommunity Hospital, Whittier, CA |
|            |              | St. Francis Medical Center, Los Angeles, CA        |
| Cormier    | Clay         | Henry Mayo Hospital, Newhall, CA                   |
| Corrigan   | Peter        | Huntington Memorial Hospital, Pasadena, CA         |
| Cotner     | Edward       | St. John's Hospital, Santa Monica, CA              |
| Crabb      | Jonathan     | Verdugo Hills Hospital, Glendale, CA               |
|            |              | Huntington Memorial Hospital, Pasadena, CA         |
| Crisan     | Adrian       | Presbyterian Intercommunity Hospital, Whittier, CA |
| Crowley    | Joanne       | Long Beach Memorial Hospital, Long Beach, CA       |
| Cummings   | Bruce        | Providence Holy Cross Hospital, Mission Hills, CA  |
| Danesh     | Mitchell     | Kaiser Permanente Hospital, Woodland Hills, CA     |
| Danna      | Salvatore A  | St. Francis Medical Center, Los Angeles, CA        |
| Dannenberg | Bernard      | Glendale Memorial Medical Center, Glendale, CA     |
| Davis      | Maria        | St. Francis Medical Center, Los Angeles, CA        |
| Deng       | Charles      | Providence Holy Cross Hospital, Mission Hills, CA  |
| Dennis     | Fred         | Encino Hospital, Encino CA                         |
|            |              | Providence Tarzana Medical Center, Tarzana, CA     |
| Dennis     | Frederick    | Brotman Medical Center, Culver City, CA            |
| Derbigny   | Monica       | St. Francis Medical Center, Los Angeles, CA        |
| Desai      | Bhupatrai H  | Pomona Valley Hospital Medical Center, Pomona, CA  |
| DeTrana    | Frank        | Antelope Valley Hospital, Lancaster, CA            |
| Deuson     | Travis       | Antelope Valley Hospital, Lancaster, CA            |
|            |              | Henry Mayo Hospital, Newhall, CA                   |
| Dhillon    | Surisham     | Henry Mayo Hospital, Newhall, CA                   |
| Diaz       | Jose         | Encino Hospital, Encino CA                         |
|            |              | Providence Tarzana Medical Center, Tarzana, CA     |
| Diaz       | Marco        | St. Mary Medical Center, Long Beach, CA            |
| Diaz       | Marco A.     | Little Company of Mary Hospital, San Pedro, CA     |
| Diaz       | Sabrina      | St. John's Hospital, Santa Monica, CA              |
| Dimassa    | Giancarlo    | White Memorial Hospital, Los Angeles, CA           |
| DiMassa    | GianCarlo    | Long Beach Memorial Hospital, Long Beach, CA       |
| Donnelly   | Sandra       | WhittierCommunity Hospital, Whittier, CA           |
| Dorian     | Armand       | Verdugo Hills Hospital, Glendale, CA               |
| Dorosh     | Richard      | Pomona Valley Hospital Medical Center, Pomona, CA  |
| Dyne       | Pamela       | Olive View-UCLA Medical Center, Sylmar, CA         |
| Eckstein   | Marc         | LAC+USC Medical Center, Los Angeles, CA            |
| Edholm     | Thomas       | Pomona Valley Hospital Medical Center, Pomona, CA  |
| Edwards    | Irb          | Mission Community Hospital, Panorama City, CA      |
| Edwards    | Irv          | Encino Hospital, Encino CA                         |
| Edwards    | Irv          | Providence Tarzana Medical Center, Tarzana, CA     |

|                          |          |                                                                                                                               |
|--------------------------|----------|-------------------------------------------------------------------------------------------------------------------------------|
| Edwards-Lee              | Terri    | Harbor-UCLA Medical Center, Los Angeles, CA                                                                                   |
| Eisner                   | David    | Brotman Medical Center, Culver City, CA                                                                                       |
| El-Tobgy                 | Eric     | West Hills Hospital, Los Angeles, CA                                                                                          |
| Eliashiv                 | Dawn     | Cedars - Sinai Medical Center, Los Angeles, CA                                                                                |
| Engelberg                | Teri     | West Hills Hospital, Los Angeles, CA                                                                                          |
| Fagan                    | Phil     | Good Samaritan Hospital, Los Angeles, CA                                                                                      |
| Faisal                   | Fawaz    | Providence St. Joseph Medical Center, Burbank, CA                                                                             |
| Fakoory                  | Jacob    | Methodist Hospital, Arcadia, CA                                                                                               |
| Farsheed                 | Nikbakht | Verdugo Hills Hospital, Glendale, CA                                                                                          |
| Fauble                   | Thomas J | Methodist Hospital, Arcadia, CA                                                                                               |
| Fausto                   | Farfan   | Kaiser Permanente Hospital, Woodland Hills, CA                                                                                |
| Fernandez-<br>Frackelton | Madonna  | Harbor-UCLA Medical Center, Los Angeles, CA                                                                                   |
| Fineman                  | Igor     | Glendale Memorial Medical Center, Glendale, CA<br>Huntington Memorial Hospital, Pasadena, CA                                  |
| Finkel                   | Michelle | Little Company of Mary Hospital, Torrance, CA                                                                                 |
| Fisher                   | Jason    | Long Beach Memorial Hospital, Long Beach, CA<br>Providence Holy Cross Hospital, Mission Hills, CA                             |
| Flaherty                 | Heather  | Henry Mayo Hospital, Newhall, CA                                                                                              |
| Flashman                 | Robert   | St. Francis Medical Center, Los Angeles, CA                                                                                   |
| Fong                     | Brian    | St. Mary Medical Center, Long Beach, CA                                                                                       |
| Forgey                   | Ron      | Long Beach Memorial Hospital, Long Beach, CA                                                                                  |
| Frankle                  | David    | Cedars - Sinai Medical Center, Los Angeles, CA                                                                                |
| Friedlander              | Josiah   | Glendale Memorial Medical Center, Glendale, CA                                                                                |
| Friedman                 | Howard   | Pomona Valley Hospital Medical Center, Pomona, CA                                                                             |
| Friend                   | David    | Glendale Memorial Medical Center, Glendale, CA Adventist                                                                      |
| Futernick                | Marc     | California Hospital Medical Center, Los Angeles, CA                                                                           |
| Gabrielian               | Ara      | Kaiser Permanente Hospital, Woodland Hills, CA                                                                                |
| Gale                     | Leonard  | Presbyterian Intercommunity Hospital, Whittier, CA                                                                            |
| Ganguly                  | Gautam   | Presbyterian Intercommunity Hospital, Whittier, CA                                                                            |
| Gausche -Hill            | Marianne | Harbor-UCLA Medical Center, Los Angeles, CA<br>Little Company of Mary Hospital, Torrance, CA                                  |
| Geiderman                | Joel     | Cedars - Sinai Medical Center, Los Angeles, CA                                                                                |
| Gerberich                | Bradley  | West Hills Hospital, Los Angeles, CA                                                                                          |
| Gertz                    | Michael  | Antelope Valley Hospital, Lancaster, CA<br>St. John's Hospital, Santa Monica, CA                                              |
| Gharakhani               | Hossein  | West Hills Hospital, Los Angeles, CA                                                                                          |
| Ghurabi                  | Wally    | Santa Monica-UCLA Medical Center, Santa Monica, CA                                                                            |
| Giannotta                | Steven   | LAC+USC Medical Center, Los Angeles, CA                                                                                       |
| Gibbs                    | Harlan   | Glendale Memorial Medical Center, Glendale, CA Adventist                                                                      |
| Giem                     | Paul     | San Dimas Community Hospital, San Dimas, CA                                                                                   |
| Giombetti                | Robert   | St. John's Hospital, Santa Monica, CA                                                                                         |
| Gold                     | Michael  | St. John's Hospital, Santa Monica, CA                                                                                         |
| Gold                     | Simone   | St. John's Hospital, Santa Monica, CA                                                                                         |
| Goldberg                 | Mark     | Harbor-UCLA Medical Center, Los Angeles, CA                                                                                   |
| Goldberg                 | Richard  | Providence St. Joseph Medical Center, Burbank, CA                                                                             |
| Goldfarb                 | Stuart   | Mission Community Hospital, Panorama City, CA<br>Encino Hospital, Encino CA<br>Providence Tarzana Medical Center, Tarzana, CA |
| Goldweber                | Robert   | Huntington Memorial Hospital, Pasadena, CA                                                                                    |
| Gonella                  | Paula    | Marina Del Rey Hospital, Los Angeles, CA                                                                                      |

|                    |                |                                                     |
|--------------------|----------------|-----------------------------------------------------|
| Gonzalez           | Jamie E.       | Presbyterian Intercommunity Hospital, Whittier, CA  |
| Gordon             | Haas R.        | California Hospital Medical Center, Los Angeles, CA |
| Graham             | Richard        | California Hospital Medical Center, Los Angeles, CA |
| Grant              | James David    | Methodist Hospital, Arcadia, CA                     |
| Grant              | Valerie        | Little Company of Mary Hospital, San Pedro, CA      |
| Green              | Vincent        | St. Mary Medical Center, Long Beach, CA             |
|                    |                | Encino Hospital, Encino CA                          |
| Greenspan          | Jason          | Providence Tarzana Medical Center, Tarzana, CA      |
|                    |                | Encino Hospital, Encino CA                          |
|                    |                | Providence Tarzana Medical Center, Tarzana, CA      |
|                    |                | Mission Community Hospital, Panorama City, CA       |
| Gregory            | William        | Antelope Valley Hospital, Lancaster, CA             |
|                    |                | Huntington Memorial Hospital, Pasadena, CA          |
| Gross              | Hyman          | Brotman Medical Center, Culver City, CA             |
| Grossman           | Daniel         | St. John's Hospital, Santa Monica, CA               |
| Gupta              | Atul           | Long Beach Memorial Medical Center, Long Beach, CA  |
| Gupta              | Malkeet        | Antelope Valley Hospital, Lancaster, CA             |
| Hackett            | Theodore       | Verdugo Hills Hospital, Glendale, CA                |
| Hackett            | Tiffany        | Cedars - Sinai Medical Center, Los Angeles, CA      |
| Haghighat          | Shaghayegh     | St. Mary Medical Center, Long Beach, CA             |
|                    |                | Little Company of Mary Hospital, San Pedro, CA      |
| Halem              | Larry          | Santa Monica-UCLA Medical Center, Santa Monica, CA  |
| Hardy              | David          | Cedars - Sinai Medical Center, Los Angeles, CA      |
| Harper             | Ryun           | St. Francis Medical Center, Los Angeles, CA         |
| Harris             | Brian          | Good Samaritan Hospital, Los Angeles, CA            |
| Hatherly           | John A         | Citrus Valley Medical Center, West Covina, CA       |
| Helfgott           | Paul           | Presbyterian Intercommunity Hospital, Whittier, CA  |
| Heller             | Barry          | St. Mary Medical Center, Long Beach, CA             |
| Heller             | Barry          | Little Company of Mary Hospital, San Pedro, CA      |
| Hemingway          | Thomas Jared   | Antelope Valley Hospital, Lancaster, CA             |
|                    |                | Olive View-UCLA Medical Center, Sylmar, CA          |
| Henry              | David          | Henry Mayo Hospital, Newhall, CA                    |
| Herbert            | Mel            | LAC+USC Medical Center, Los Angeles, CA             |
| Hernandez          | Anthony        | White Memorial Hospital, Los Angeles, CA            |
|                    |                | Olympia Hosp., Los Angeles, CA                      |
| Hernandez          | Marco F        | Olympia Hosp., Los Angeles, CA                      |
| Higgins            | Stephen Daniel | St. Francis Medical Center, Los Angeles, CA         |
| Hockberger         | Robert         | Harbor-UCLA Medical Center, Los Angeles, CA         |
| Hofmann            | Gary           | Long Beach Memorial Hospital, Long Beach, CA        |
| Hogen              | Victor         | Providence Holy Cross Hospital, Mission Hills, CA   |
| Holland            | James Paul     | Citrus Valley Medical Center, West Covina, CA       |
| Hook               | Rob            | Henry Mayo Hospital, Newhall, CA                    |
| Hovanessian        | Hoori          | Presbyterian Intercommunity Hospital, Whittier, CA  |
| Huang (Not Active) | Enoch          | Long Beach Memorial Hospital, Long Beach, CA        |
| Hyde               | Deborah        | Henry Mayo Hospital, Newhall, CA                    |
|                    |                | Northridge Hospital, Northridge, CA                 |
| Inglizian          | George         | Providence Holy Cross Hospital, Mission Hills, CA   |
| Iskander           | Raafat         | White Memorial Hospital, Los Angeles, CA            |
| Jain               | Ravin          | Providence St. Joseph Medical Center, Burbank, CA   |
| Jamehdor           | Ali            | Pomona Valley Hospital Medical Center, Pomona, CA   |

|            |               |                                                     |
|------------|---------------|-----------------------------------------------------|
| Jang       | Timothy       | Pomona Valley Hospital Medical Center, Pomona, CA   |
| Janumpally | Lingaiah      | Olive View-UCLA Medical Center, Sylmar, CA          |
| Jarema     | Edward        | Antelope Valley Hospital, Lancaster, CA             |
| Jeffords   | Brian         | Presbyterian Intercommunity Hospital, Whittier, CA  |
| Jeon       | Edward        | Cedars - Sinai Medical Center, Los Angeles, CA      |
|            |               | Northridge Hospital, Northridge, CA                 |
|            |               | Encino Hospital, Encino CA                          |
|            |               | Providence Tarzana Medical Center, Tarzana, CA      |
|            |               | West Hills Hospital, Los Angeles, CA                |
| Jetton     | Bruce         | Lakewood Regional Medical Center, Lakewood, CA      |
| Johnson JR | James         | San Dimas Community Hospital, San Dimas, CA         |
| Johnson    | Diane         | Good Samaritan Hospital, Los Angeles, CA            |
| Johnson    | Karen Sue     | Brotman Medical Center, Culver City, CA             |
| Johnson    | Randall       | WhittierComminuty Hospital, Whittier, CA            |
| Johnston   | Brian         | White Memorial Hospital, Los Angeles, CA            |
| Jones      | James Linder  | Citrus Valley Medical Center, West Covina, CA       |
| Jones      | Michael       | West Hills Hospital, Los Angeles, CA                |
| Jones      | Stephen       | Northridge Hospital, Northridge, CA                 |
| Jong       | Donald        | Kaiser Permanente Hospital, Woodland Hills, CA      |
| Joyner     | Mark          | Little Company of Mary Hospital, San Pedro, CA      |
| Joyner     | Mark          | St. Mary Medical Center, Long Beach, CA             |
| Kaji       | Amy           | Harbor-UCLA Medical Center, Los Angeles, CA         |
|            |               | Long Beach Memorial Hospital, Long Beach, CA        |
| Kalter     | Stanley       | Huntington Memorial Hospital, Pasadena, CA          |
| Kamangar   | Nader         | Olive View-UCLA Medical Center, Sylmar, CA          |
| Kaminsky   | Robin         | St. John's Hospital, Santa Monica, CA               |
|            |               | White Memorial Hospital, Los Angeles, CA            |
| Kaplan     | Alexander     | St. Francis Medical Center, Los Angeles, CA         |
| Karayan    | Ronnie        | Providence St. Joseph Medical Center, Burbank, CA   |
| Kassinove  | Andrew Steven | Lakewood Regional Medical Center, Lakewood, CA      |
| Kay        | Rosanne       | Marina Del Rey Hospital, Los Angeles, CA            |
| Keane      | Christopher   | St. John's Hospital, Santa Monica, CA               |
|            |               | Providence St. Joseph Medical Center, Burbank, CA   |
| Kerns      | Robert        | Good Samaritan Hospital, Los Angeles, CA            |
| Keswani    | Vineeta       | California Hospital Medical Center, Los Angeles, CA |
| Khan       | Faraaz        | Glendale Memorial Medical Center, Glendale, CA      |
| Kheradyar  | David         | Marina Del Rey Hospital, Los Angeles, CA            |
| Kijner     | Daniel        | Northridge Hospital, Northridge, CA                 |
| Kilagbhan  | Taline        | Huntington Memorial Hospital, Pasadena, CA          |
| Kim        | Doojin        | Santa Monica-UCLA Medical Center, Sana Monica, CA   |
|            |               | UCLA Medical Center, Los Angeles, CA                |
| Kim        | Duk           | Long Beach Memorial Hospital, Long Beach, CA        |
| Kim        | James S.      | Pomona Valley Hospital Medical Center, Pomona, CA   |
| Kino       | Russ          | St. John's Hospital, Santa Monica, CA               |
| Kirk       | Michael       | West Hills Hospital, Los Angeles, CA                |
| Kishineff  | Steve         | Providence St. Joseph Medical Center, Burbank, CA   |
| Kiss       | Dan           | Presbyterian Intercommunity Hospital, Whittier, CA  |
| Koenig     | William       | Long Beach Memorial Hospital, Long Beach, CA        |
| Kojian     | James         | Citrus Valley Medical Center, West Covina, CA       |
| Kojian     | James         | Presbyterian Intercommunity Hospital, Whittier, CA  |

|              |               |                                                          |
|--------------|---------------|----------------------------------------------------------|
| Kolodny      | Mickey        | Marina Del Rey Hospital, Los Angeles, CA                 |
| Konia        | Nadine        | San Dimas Community Hospital, San Dimas, CA              |
| Koplovsky    | Amy           | St. Francis Medical Center, Los Angeles, CA              |
| Kramer       | Ian           | Presbyterian Intercommunity Hospital, Whittier, CA       |
| Kroes        | Jeremy        | Lakewood Regional Medical Center, Lakewood, CA           |
| Kuban        | Alan          | West Hills Hospital, Los Angeles, CA                     |
| Kudrow       | David         | St. John's Hospital, Santa Monica, CA                    |
| Kuhn         | Nancy         | Good Samaritan Hospital, Los Angeles, CA                 |
| Kulkarni     | Raghavendra   | Olive View-UCLA Medical Center, Sylmar, CA               |
| LaFemenia    | Michael       | Kaiser Permanente Hospital, Woodland Hills, CA           |
| Lai          | Roger         | Providence St. Joseph Medical Center, Burbank, CA        |
| Lalli        | John          | Brotman Medical Center, Culver City, CA                  |
| Lampe        | Christopher J | Long Beach Memorial Hospital, Long Beach, CA             |
| Lawrence     | Jon           | St. Mary Medical Center, Long Beach, CA                  |
| Lawrence     | Tracy         | Encino Hospital, Encino CA                               |
|              |               | Providence Tarzana Medical Center, Tarzana, CA           |
| Lawrence     | Tracy (Bud)   | Henry Mayo Hospital, Newhall, CA                         |
| Lee          | Cheryl        | Glendale Memorial Medical Center, Glendale, CA Adventist |
| Lee          | John          | Pomona Valley Hospital Medical Center, Pomona, CA        |
| Lee          | Lance         | Verdugo Hills Hospital, Glendale, CA                     |
|              |               | Glendale Adventist Medical Center, Glendale CA           |
| Lee          | Stan          | Providence St. Joseph Medical Center, Burbank, CA        |
| Lee          | Thomas        | Antelope Valley Hospital, Lancaster, CA                  |
| Lee          | Timothy       | Long Beach Memorial Hospital, Long Beach, CA             |
|              |               | St. Mary Medical Center, Long Beach, CA                  |
| Leidner      | Michael       | Antelope Valley Hospital, Lancaster, CA                  |
| Leung        | John          | Huntington Memorial Hospital, Pasadena, CA               |
|              |               | Garfield Medical Center, Monterey Park, CA               |
|              |               | Methodist Hospital, Arcadia, CA                          |
| Levenson     | Henry         | Huntington Memorial Hospital, Pasadena, CA               |
| Levin        | John          | Methodist Hospital, Arcadia, CA                          |
| Levy         | Sara          | California Hospital Medical Center, Los Angeles, CA      |
| Lew          | Brandon       | Huntington Memorial Hospital, Pasadena, CA               |
| Lewis        | Roger Jay     | Harbor-UCLA Medical Center, Los Angeles, CA              |
| Liebeskind   | David         | UCLA Medical Center, Los Angeles, CA                     |
| Liker        | Mark          | Providence Holy Cross Hospital, Mission Hills, CA        |
|              |               | Henry Mayo Hospital, Newhall, CA                         |
| Lin          | Wendy         | Cedars - Sinai Medical Center, Los Angeles, CA           |
| Lindo        | Ruth          | White Memorial Hospital, Los Angeles, CA                 |
| Lipsky       | Ari           | Harbor-UCLA Medical Center, Los Angeles, CA              |
| Liu          | Antonio       | White Memorial Hospital, Los Angeles, CA                 |
|              |               | California Hospital Medical Center, Los Angeles, CA      |
| Liu          | June-Chin     | Methodist Hospital, Arcadia, CA                          |
| Liu          | Stephen       | California Hospital Medical Center, Los Angeles, CA      |
| Lizaso       | Knef V.       | Little Company of Mary Hospital, San Pedro, CA           |
| Loftus       | James         | Cedars - Sinai Medical Center, Los Angeles, CA           |
| Lopata       | Scott         | Brotman Medical Center, Culver City, CA                  |
| Lopez-Cuenca | Victor Manuel | Encino Hospital, Encino CA                               |
|              |               | Providence Tarzana Medical Center, Tarzana, CA           |
| Lorber       | Peter         | Good Samaritan Hospital, Los Angeles, CA                 |

|              |               |                                                     |
|--------------|---------------|-----------------------------------------------------|
| Louden       | Mark          | St. Francis Medical Center, Los Angeles, CA         |
| Lum          | Franklin      | Providence St. Joseph Medical Center, Burbank, CA   |
| Luna         | James         | Huntington Memorial Hospital, Pasadena, CA          |
| Lundberg     | Scott         | Olive View-UCLA Medical Center, Sylmar, CA          |
| Lutsky       | Zachary       | Santa Monica-UCLA Medical Center, Santa Monica, CA  |
| Lynch        | Robert Joseph | Methodist Hospital, Arcadia, CA                     |
| Lynn         | John          | Antelope Valley Hospital, Lancaster, CA             |
| Maatz        | Russell E.    | Methodist Hospital, Arcadia, CA                     |
| Mandavia     | Diku          | Olympia Hosp., Los Angeles, CA                      |
| Mandavia     | Sujal         | Olympia Hosp., Los Angeles, CA                      |
| Mansour      | Khalifa       | St. Francis Medical Center, Los Angeles, CA         |
| Marshall     | Lilly         | Sherman Oaks Hospital, Sherman Oaks, CA             |
| Martin       | Francois      | Providence St. Joseph Medical Center, Burbank, CA   |
| Martin       | Michael L     | Presbyterian Intercommunity Hospital, Whittier, CA  |
| Martinez     | Marc          | West Hills Hospital, Los Angeles, CA                |
| Masri        | Samar         | Glendale Memorial Medical Center, Glendale, CA      |
| Massey       | Ed            | Cedars - Sinai Medical Center, Los Angeles, CA      |
| Massoudian   | Bobby         | Long Beach Memorial Hospital, Long Beach, CA        |
| McCall       | John          | St. Mary Medical Center, Long Beach, CA             |
| McDavitt     | Christine     | California Hospital Medical Center, Los Angeles, CA |
| McFarland    | Douglas W.    | St. Mary Medical Center, Long Beach, CA             |
|              |               | Little Company of Mary Hospital, San Pedro, CA      |
| McIntyre     | Hugh          | Harbor-UCLA Medical Center, Los Angeles, CA         |
| Mckittrick   | Ann           | Northridge Hospital, Northridge, CA                 |
| Medina       | Carlos        | Torrance Memorial Medical Center, Torrance, CA      |
| Mehta        | Parag         | Little Company of Mary Hospital, San Pedro, CA      |
| Meindlholman | Judi          | Northridge Hospital, Northridge, CA                 |
| Melendez     | Ron           | Little Company of Mary Hospital, San Pedro, CA      |
| Menchine     | Michael       | Antelope Valley Hospital, Lancaster, CA             |
| Meyer        | Gregory       | Presbyterian Intercommunity Hospital, Whittier, CA  |
| Mi           | Wei           | Northridge Hospital, Northridge, CA                 |
|              |               | Encino Hospital, Encino CA                          |
|              |               | Providence Tarzana Medical Center, Tarzana, CA      |
| Mikhail      | Asbasia A     | Huntington Memorial Hospital, Pasadena, CA          |
| Miller       | Van Hubert    | St. Francis Medical Center, Los Angeles, CA         |
| Milstein     | David         | Hollywood Presbyterian Hospital, Los Angeles, CA    |
| Minassian    | Haig          | Presbyterian Intercommunity Hospital, Whittier, CA  |
| Minazad      | Yafa          | Huntington Memorial Hospital, Pasadena, CA          |
| Mistry       | Sameer        | Little Company of Mary Hospital, San Pedro, CA      |
|              |               | St. Mary Medical Center, Long Beach, CA             |
| Mitchell     | Danesh        | Kaiser Permanente Hospital, Woodland Hills, CA      |
| Miura        | Brian         | Torrance Memorial Medical Center, Torrance, CA      |
| Mobin        | Fardad        | St. John's Hospital, Santa Monica, CA               |
| Mohsen       | Ali Ibrahim   | San Dimas Community Hospital, San Dimas, CA         |
| Molaie       | Majid         | Little Company of Mary Hospital, San Pedro, CA      |
| Montoya      | Maria         | Verdugo Hills Hospital, Glendale, CA                |
| Moore        | Ken           | Pomona Valley Hospital Medical Center, Pomona, CA   |
| Moran        | Gregory       | Olive View-UCLA Medical Center, Sylmar, CA          |
| Moreau       | Gary          | Long Beach Memorial Hospital, Long Beach, CA        |
| Moy          | Kenneth       | Encino Hospital, Encino CA                          |



|           |               |                                                          |
|-----------|---------------|----------------------------------------------------------|
| Mucia     | John          | Providence Tarzana Medical Center, Tarzana, CA           |
| Mueller   | Joseph        | Methodist Hospital, Arcadia, CA                          |
| Muller    | Ridgely       | Little Company of Mary Hospital, Torrance, CA            |
| Munoz     | David         | Huntington Memorial Hospital, Pasadena, CA               |
|           |               | Little Company of Mary Hospital, San Pedro, CA           |
|           |               | St. Mary Medical Center, Long Beach, CA                  |
| Murphy    | Gregory       | Pomona Valley Hospital Medical Center, Pomona, CA        |
| Murray    | John          | White Memorial Hospital, Los Angeles, CA                 |
| Myers     | Derrick       | Olympia Hosp., Los Angeles, CA                           |
| Nakagawa  | Joe           | Antelope Valley Hospital, Lancaster, CA                  |
| Nakamoto  | Kenneth       | Pomona Valley Hospital Medical Center, Pomona, CA        |
| Nakkim    | Eric          | Torrance Memorial Medical Center, Torrance, CA           |
| Nayyar    | Kanwal        | Providence Holy Cross Hospital, Mission Hills, CA        |
| Nelsen    | Mihoko        | Huntington Memorial Hospital, Pasadena, CA               |
| Newman    | Siobhan       | Hollywood Presbyterian Hospital, Los Angeles, CA         |
| Ng        | Christopher   | Hollywood Presbyterian Hospital, Los Angeles, CA         |
| Ngo       | Phong         | Glendale Memorial Medical Center, Glendale, CA           |
| Ngo       | Phong Xuan    | Methodist Hospital, Arcadia, CA                          |
| Nguyen    | Tuan          | Long Beach Memorial Hospital, Long Beach, CA             |
| Nguyen    | Tuan          | Presbyterian Intercommunity Hospital, Whittier, CA       |
| Niemann   | James         | Harbor-UCLA Medical Center, Los Angeles, CA              |
| Noll      | Edmond        | Glendale Memorial Medical Center, Glendale, CA           |
|           |               | Glendale Memorial Medical Center, Glendale, CA Adventist |
| Novom     | Steven        | Sherman Oaks Hospital, Sherman Oaks, CA                  |
| O'Conner  | Ryan          | St. John's Hospital, Santa Monica, CA                    |
| O'Connor  | Edward        | St. John's Hospital, Santa Monica, CA                    |
| Obligato  | Pete          | Providence St. Joseph Medical Center, Burbank, CA        |
| Oblitas   | Daniel        | Good Samaritan Hospital, Los Angeles, CA                 |
| Omidvar   | Omid          | Long Beach Memorial Hospital, Long Beach, CA             |
| Ong       | Sam           | Olive View-UCLA Medical Center, Sylmar, CA               |
| Orfuss    | Carl          | St. John's Hospital, Santa Monica, CA                    |
| Ouligian  | Gregory       | Brotman Medical Center, Culver City, CA                  |
| Ovbiagele | Bruce         | UCLA Medical Center, Los Angeles, CA                     |
|           |               | Olive View-UCLA Medical Center, Sylmar, CA               |
| Oveian    | Margarita     | Providence St. Joseph Medical Center, Burbank, CA        |
| Owashi    | Norman        | Citrus Valley Medical Center, West Covina, CA            |
| Pableo    | Geoffrey      | Pomona Valley Hospital Medical Center, Pomona, CA        |
| Pagano    | James         | San Dimas Community Hospital, San Dimas, CA              |
| Pak       | Kenneth M C   | Citrus Valley Medical Center, West Covina, CA            |
| Parag     | Mehta         | Little Company of Mary Hospital, San Pedro, CA           |
| Paras     | Raymundo      | Mission Community Hospital, Panorama City, CA            |
| Park      | Catherine     | Providence Tarzana Medical Center, Tarzana, CA           |
| Patel     | Hites         | Henry Mayo Hospital, Newhall, CA                         |
| Patel     | Nirav         | Long Beach Memorial Hospital, Long Beach, CA             |
| Peek      | Corbett Grant | San Dimas Community Hospital, San Dimas, CA              |
| Pelayo    | Arturo        | St. Francis Medical Center, Los Angeles, CA              |
| Peterson  | Mike          | Harbor-UCLA Medical Center, Los Angeles, CA              |
| Pfahler   | Jolie         | St. John's Hospital, Santa Monica, CA                    |
| Pham      | Michael       | Mission Community Hospital, Panorama City, CA            |
| Phillips  | Michael       | White Memorial Hospital, Los Angeles, CA                 |

|              |              |                                                    |
|--------------|--------------|----------------------------------------------------|
| Pi           | John         | Olive View-UCLA Medical Center, Sylmar, CA         |
| Pisupati     | Deepti       | Harbor-UCLA Medical Center, Los Angeles, CA        |
| Platzer      | Meril        | Encino Hospital, Encino CA                         |
|              |              | Providence Tarzana Medical Center, Tarzana, CA     |
|              |              | West Hills Hospital, Los Angeles, CA               |
| Plosay       | John         | White Memorial Hospital, Los Angeles, CA           |
| Pousson      | Gregory      | Providence Holy Cross Hospital, Mission Hills, CA  |
| Prakash      | Amitabh      | WhittierCommunity Hospital, Whittier, CA           |
| Pratt        | Frank        | Torrance Memorial Medical Center, Torrance, CA     |
| Presser      | David        | Torrance Memorial Medical Center, Torrance, CA     |
| Privett      | Darrin       | Henry Mayo Hospital, Newhall, CA                   |
| Pulera       | Mark         | Santa Monica-UCLA Medical Center, Santa Monica, CA |
|              |              | St. John's Hospital, Santa Monica, CA              |
| Ramezan-Arab | Nima         | Long Beach Memorial Hospital, Long Beach, CA       |
| Rapetti      | Edward       | Glendale Memorial Medical Center, Glendale, CA     |
| Reddy        | Usha Rani K. | St. Mary Medical Center, Long Beach, CA            |
|              |              | Little Company of Mary Hospital, San Pedro, CA     |
| Rederich     | George       | Torrance Memorial Medical Center, Torrance, CA     |
| Rederich     | George       | Little Company of Mary Hospital, Torrance, CA      |
| Restrepo     | Lucas        | UCLA Medical Center, Los Angeles, CA               |
| Rhee         | Paul         | Huntington Memorial Hospital, Pasadena, CA         |
| Rho          | Jai Hyon     | Huntington Memorial Hospital, Pasadena, CA         |
| Richman      | Mark         | Olive View-UCLA Medical Center, Sylmar, CA         |
| Ricketts     | Venela B.    | Olive View-UCLA Medical Center, Sylmar, CA         |
| Ries         | Jeffrey      | Pomona Valley Hospital Medical Center, Pomona, CA  |
| Rison        | Richard      | Presbyterian Intercommunity Hospital, Whittier, CA |
| Robert       | Romero H     | Methodist Hospital, Arcadia, CA                    |
| Rokos        | Ivan         | Northridge Hospital, Northridge, CA                |
|              |              | Olive View-UCLA Medical Center, Sylmar, CA         |
| Rosenbloom   | Robert       | Olive View-UCLA Medical Center, Sylmar, CA         |
|              |              | Brotman Medical Center, Culver City, CA            |
| Roy          | Dolly        | Northridge Hospital, Northridge, CA                |
| Rutkowski    | Anne         | Long Beach Memorial Hospital, Long Beach, CA       |
| Sabahi       | Houtan       | Encino Hospital, Encino CA                         |
|              |              | Providence Tarzana Medical Center, Tarzana, CA     |
| Sachs        | Joseph       | Northridge Hospital, Northridge, CA                |
| Sahagun      | Oliver       | Henry Mayo Hospital, Newhall, CA                   |
| Salazar      | Susan Marie  | Marina Del Rey Hospital, Los Angeles, CA           |
| Samaniego    | Loretta      | Hollywood Presbyterian Hospital, Los Angeles, CA   |
|              |              | Good Samaritan Hospital, Los Angeles, CA           |
| Sanossian    | Nerses       | LAC+USC Medical Center, Los Angeles, CA            |
| Sarti        | Michael      | Providence Holy Cross Hospital, Mission Hills, CA  |
| Sauer        | Tamar        | Mission Community Hospital, Panorama City, CA      |
|              |              | Encino Hospital, Encino CA                         |
|              |              | Providence Tarzana Medical Center, Tarzana, CA     |
| Saver        | Jeff         | UCLA Medical Center, Los Angeles, CA               |
| Savur        | Vivek        | Northridge Hospital, Northridge, CA                |
|              |              | West Hills Hospital, Los Angeles, CA               |
| Schatz       | Ivan         | Pomona Valley Hospital Medical Center, Pomona, CA  |
| Schmidt      | David        | Henry Mayo Hospital, Newhall, CA                   |

|              |               |                                                          |
|--------------|---------------|----------------------------------------------------------|
| Schmitz      | Charles Fidel | Harbor-UCLA Medical Center, Los Angeles, CA              |
| Schugt       | John          | Torrance Memorial Medical Center, Torrance, CA           |
| Schultz      | Charles       |                                                          |
| Schultz      | Malcolm       | Henry Mayo Hospital, Newhall, CA                         |
| Schultz      | Mark          | Henry Mayo Hospital, Newhall, CA                         |
| Schultz      | Matthew       | Pomona Valley Hospital Medical Center, Pomona, CA        |
| Schwarzman   | Philip        | Providence St. Joseph Medical Center, Burbank, CA        |
| Sebastian    | Ray           | Long Beach Memorial Hospital, Long Beach, CA             |
| Sengupta     | Veena         | West Hills Hospital, Los Angeles, CA                     |
| Serna        | Monica        | Lakewood Regional Medical Center, Lakewood, CA           |
| Shanmugam    | Vijay         | Antelope Valley Hospital, Lancaster, CA                  |
| Shapiro      | Robert        | Presbyterian Intercommunity Hospital, Whittier, CA       |
| Shaw         | Miles         | St. Mary Medical Center, Long Beach, CA                  |
|              |               | Little Company of Mary Hospital, San Pedro, CA           |
| Shea         | Stephen R     | St. Mary Medical Center, Long Beach, CA                  |
|              |               | Little Company of Mary Hospital, San Pedro, CA           |
| Sheer        | William       | Marina Del Rey Hospital, Los Angeles, CA                 |
| Shen         | Andrew H      | Torrance Memorial Medical Center, Torrance, CA           |
| Shey         | Randolph      | Long Beach Memorial Hospital, Long Beach, CA             |
| Shimizu      | Russ          | St. John's Hospital, Santa Monica, CA                    |
| Shlamovitz   | Gil           | Olive View-UCLA Medical Center, Sylmar, CA               |
| Shoji        | Kent          | Little Company of Mary Hospital, Torrance, CA            |
| Shoji        | Kent          | Marina Del Rey Hospital, Los Angeles, CA                 |
| Shook        | Glen Donald   | Presbyterian Intercommunity Hospital, Whittier, CA       |
| Shook        | Victoria      | Pomona Valley Hospital Medical Center, Pomona, CA        |
| Siegel       | Jennifer      | Mission Community Hospital, Panorama City, CA            |
| Silka        | Paul          | Cedars - Sinai Medical Center, Los Angeles, CA           |
| Simic        | P. John       | Providence St. Joseph Medical Center, Burbank, CA        |
| Sims         | Jessica       | California Hospital Medical Center, Los Angeles, CA      |
| Sindell      | Gary          | West Hills Hospital, Los Angeles, CA                     |
| Singh        | Ravinder      | Brotman Medical Center, Culver City, CA                  |
|              |               | Cedars - Sinai Medical Center, Los Angeles, CA           |
| Slabaugh     | P. Douglas    | Whittier Hospital Medical Center, Whittier, CA           |
| Slay         | Robert        | Marina Del Rey Hospital, Los Angeles, CA                 |
| Smith        | Dallas        | Sherman Oaks Hospital, Sherman Oaks, CA                  |
| Sotiropoulos | Georgia       | Huntington Memorial Hospital, Pasadena, CA               |
| Sous         | Nagi          | Kaiser - Sunset                                          |
| Spencer      | Christopher   | Antelope Valley Hospital, Lancaster, CA                  |
| Splawn       | Robert        | California Hospital Medical Center, Los Angeles, CA      |
| Stagg        | Sara          | Brotman Medical Center, Culver City, CA                  |
| Stanford     | Brian         | Glendale Memorial Medical Center, Glendale, CA Adventist |
| Stanley      | Julian        | White Memorial Hospital, Los Angeles, CA                 |
| Starkman     | Sidney        | Santa Monica-UCLA Medical Center, Santa Monica, CA       |
|              |               | UCLA Medical Center, Los Angeles, CA                     |
|              |               | St. John's Hospital, Santa Monica, CA                    |
| Stephen      | Michael       | St. Francis Medical Center, Los Angeles, CA              |
| Stevens      | Carl          | Harbor-UCLA Medical Center, Los Angeles, CA              |
| Stock        | Lawrence      | Antelope Valley Hospital, Lancaster, CA                  |
| Stone        | Amy           | Long Beach Memorial Hospital, Long Beach, CA             |
| Suleiman     | Mustafa       | Presbyterian Intercommunity Hospital, Whittier, CA       |
| Sulmeyer     | Gina          | Torrance Memorial Medical Center, Torrance, CA           |

|             |                |                                                                                                                     |
|-------------|----------------|---------------------------------------------------------------------------------------------------------------------|
| Sung        | Gene           | LAC+USC Medical Center, Los Angeles, CA                                                                             |
| Sung        | Jeff           | Providence Holy Cross Hospital, Mission Hills, CA                                                                   |
| Sutikno-Ong | Rio            | Presbyterian Intercommunity Hospital, Whittier, CA                                                                  |
| Sutter      | Garret         | Olympia Hosp., Los Angeles, CA                                                                                      |
| Sutter      | Garrett        | Henry Mayo Hospital, Newhall, CA                                                                                    |
| Svimonoff   | Constantine    | Lakewood Regional Medical Center, Lakewood, CA                                                                      |
| Swanson     | Paul           | White Memorial Hospital, Los Angeles, CA                                                                            |
| Tabib       | Shahram        | Hollywood Presbyterian Hospital, Los Angeles, CA                                                                    |
| Talan       | David Andrew   | Olive View-UCLA Medical Center, Sylmar, CA                                                                          |
| Taraska     | Rich           | Long Beach Memorial Hospital, Long Beach, CA                                                                        |
| Tarnay      | Mike           | Torrance Memorial Medical Center, Torrance, CA                                                                      |
| Tashman     | David          | Verdugo Hills Hospital, Glendale, CA                                                                                |
| Testa       | Nicholas       | Hollywood Presbyterian Hospital, Los Angeles, CA                                                                    |
| Thai        | Tran Huy       | California Hospital Medical Center, Los Angeles, CA                                                                 |
| Thomas      | Michael        | Presbyterian Intercommunity Hospital, Whittier, CA                                                                  |
| Thompson    | David          | Glendale Memorial Medical Center, Glendale, CA<br>Adventist<br>Verdugo Hills Hospital, Glendale, CA                 |
| Ting        | Grace          | San Gabriel                                                                                                         |
| Tizes-Gold  | Simone         | St. John's Hospital, Santa Monica, CA                                                                               |
| Tomasi      | Andrew         | Brotman Medical Center, Culver City, CA                                                                             |
| Torbati     | Sam            | Cedars - Sinai Medical Center, Los Angeles, CA                                                                      |
| Toth        | Jason          | Providence St. Joseph Medical Center, Burbank, CA                                                                   |
| Treciokas   | Leo            | St. John's Hospital, Santa Monica, CA                                                                               |
| Tsai        | David          | San Dimas Community Hospital, San Dimas, CA                                                                         |
| Tseng       | Peter          | Torrance Memorial Medical Center, Torrance, CA                                                                      |
| Ujkic       | Pierre         | Pomona Valley Hospital Medical Center, Pomona, CA                                                                   |
| Ullman      | Bernard        | Little Company of Mary Hospital, Torrance, CA<br>Torrance Memorial Medical Center, Torrance, CA                     |
| Urstein     | Susan          | St. John's Hospital, Santa Monica, CA                                                                               |
| Utas        | Peter          | Glendale Memorial Medical Center, Glendale, CA<br>Adventist                                                         |
| Uzun        | Guyen          | Brotman Medical Center, Culver City, CA<br>St. John's Hospital, Santa Monica, CA<br>Olympia Hosp., Los Angeles, CA  |
| Vafadari    | Peyam          | Lakewood Regional Medical Center, Lakewood, CA                                                                      |
| Vargas      | Michele Teresa |                                                                                                                     |
| Vargas      | Ximena         | Huntington Memorial Hospital, Pasadena, CA                                                                          |
| Vernon      | Arlene         | Little Company of Mary Hospital, San Pedro, CA<br>St. Mary Medical Center, Long Beach, CA                           |
| Volk        | Deborah        | Good Samaritan Hospital, Los Angeles, CA                                                                            |
| Vournas     | Jorge          | Little Company of Mary Hospital, Torrance, CA                                                                       |
| Wagner      | David          | California Hospital Medical Center, Los Angeles, CA                                                                 |
| Wallace     | Roger          | Henry Mayo Hospital, Newhall, CA                                                                                    |
| Wang        | Scott          | Providence Holy Cross Hospital, Mission Hills, CA                                                                   |
| Waskiewicz  | Thomas         | Providence Holy Cross Hospital, Mission Hills, CA                                                                   |
| Webb        | Brian          | Hollywood Presbyterian Hospital, Los Angeles, CA                                                                    |
| Weinberg    | Lawrence       | Encino Hospital, Encino CA<br>Providence Tarzana Medical Center, Tarzana, CA<br>Northridge Hospital, Northridge, CA |
| Weitz       | Michael        | St. John's Hospital, Santa Monica, CA                                                                               |
| Weitz       | Michael        | Olive View-UCLA Medical Center, Sylmar, CA                                                                          |

|            |           |                                                          |
|------------|-----------|----------------------------------------------------------|
| Wells      | Larry     | Providence St. Joseph Medical Center, Burbank, CA        |
| Westerband | Brigeli P | Methodist Hospital, Arcadia, CA                          |
| Westerband | Brigili   | Glendale Memorial Medical Center, Glendale, CA           |
| Whiteman   | Paula     | Cedars - Sinai Medical Center, Los Angeles, CA           |
| Willard    | Douglas   | Huntington Memorial Hospital, Pasadena, CA               |
| Williams   | Jeremy    | Huntington Memorial Hospital, Pasadena, CA               |
| Wilson     | Erika     | Verdugo Hills Hospital, Glendale, CA                     |
| Wogensen   | Kenneth   | Methodist Hospital, Arcadia, CA                          |
| Wong       | Curtice   | Torrance Memorial Medical Center, Torrance, CA           |
| Wong       | Evelyn    | Glendale Memorial Medical Center, Glendale, CA Adventist |
| Wong       | Patricia  | St. Francis Medical Center, Los Angeles, CA              |
| Woo        | Andrew    | St. John's Hospital, Santa Monica, CA                    |
| Xie        | Sean      | Good Samaritan Hospital, Los Angeles, CA                 |
| Yang       | Roger     | Huntington Memorial Hospital, Pasadena, CA               |
| Yarema     | Valeri    | St. John's Hospital, Santa Monica, CA                    |
| Yegyan     | Garnik    | Glendale Memorial Medical Center, Glendale, CA Adventist |
| Yick       | Dennis    | Olive View-UCLA Medical Center, Sylmar, CA               |
| Yu         | Stanley   | Kaiser Permanente Hospital, Woodland Hills, CA           |
| Zadini     | Giorgio   | California Hospital Medical Center, Los Angeles, CA      |
| Zappacosta | Rob       | Henry Mayo Hospital, Newhall, CA                         |
| Zeumer     | Christel  | Long Beach Memorial Hospital, Long Beach, CA             |
| Zibulewsky | Joseph    | Little Company of Mary Hospital, Torrance, CA            |
| Zide       | Elizabeth | California Hospital Medical Center, Los Angeles, CA      |
| Zielinski  | Steve     | Huntington Memorial Hospital, Pasadena, CA               |
| Ziemba     | Jason     | Henry Mayo Hospital, Newhall, CA                         |
| Ziman      | Ronald    | Northridge Hospital, Northridge, CA                      |
| Ziman      | Ronald    | Encino Hospital, Encino CA                               |
| Ziman      | Ronald    | Providence Tarzana Medical Center, Tarzana, CA           |
| Zlidenny   | Alexander | Providence Holy Cross Hospital, Mission Hills, CA        |
| Zoraster   | Richard   | Presbyterian Intercommunity Hospital, Whittier, CA       |
| Zyl        | Carin Van | Hollywood Presbyterian Hospital, Los Angeles, CA         |

---

The FAST-MAG Trial Coordinators

|              |          |                                               |
|--------------|----------|-----------------------------------------------|
| Aguayo       | Anna     | FAST-MAG Coordinating Center, Los Angeles, CA |
| Balauag      | Kristina | FAST-MAG Coordinating Center, Los Angeles, CA |
| Binning      | Adrienne | FAST-MAG Coordinating Center, Los Angeles, CA |
| Butel        | Jennifer | FAST-MAG Coordinating Center, Los Angeles, CA |
| Cavanaugh    | Jennifer | FAST-MAG Coordinating Center, Los Angeles, CA |
| Coleman      | Nalani   | FAST-MAG Coordinating Center, Los Angeles, CA |
| Craig        | Sharon   | FAST-MAG Coordinating Center, Los Angeles, CA |
| Feudi        | Star     | FAST-MAG Coordinating Center, Los Angeles, CA |
| Fitzgerald   | Maria    | FAST-MAG Coordinating Center, Los Angeles, CA |
| Gogesch-Lahn | Ann      | FAST-MAG Coordinating Center, Los Angeles, CA |
| Gordon       | Miranda  | FAST-MAG Coordinating Center, Los Angeles, CA |
| Haley        | Theresa  | FAST-MAG Coordinating Center, Los Angeles, CA |
| Henthorn     | Suzanne  | FAST-MAG Coordinating Center, Los Angeles, CA |
| Hodgson      | T. Keta  | FAST-MAG Coordinating Center, Los Angeles, CA |
| Ingram       | Amy      | FAST-MAG Coordinating Center, Los Angeles, CA |
| Klutch       | Rochelle | FAST-MAG Coordinating Center, Los Angeles, CA |
| Krause       | Joan     | FAST-MAG Coordinating Center, Los Angeles, CA |
| McCall       | Kanika   | FAST-MAG Coordinating Center, Los Angeles, CA |

|             |              |                                               |
|-------------|--------------|-----------------------------------------------|
| Masse       | Michelle     | FAST-MAG Coordinating Center, Los Angeles, CA |
| Morales-    |              |                                               |
| Tatgenhorst | Dolores      | FAST-MAG Coordinating Center, Los Angeles, CA |
| Nighswonger | Beverly      | FAST-MAG Coordinating Center, Los Angeles, CA |
| Nye         | Pamela       | FAST-MAG Coordinating Center, Los Angeles, CA |
| Onwunyi     | Chisom       | FAST-MAG Coordinating Center, Los Angeles, CA |
| Padilla     | Vicky        | FAST-MAG Coordinating Center, Los Angeles, CA |
| Pierce      | Brenda       | FAST-MAG Coordinating Center, Los Angeles, CA |
| Phoenix     | Rob          | FAST-MAG Coordinating Center, Los Angeles, CA |
| Real        | Courtney     | FAST-MAG Coordinating Center, Los Angeles, CA |
| Ross        | Jennifer Lea | FAST-MAG Coordinating Center, Los Angeles, CA |
| Sanoff      | Randy        | FAST-MAG Coordinating Center, Los Angeles, CA |
| Schleuter   | Gigi         | FAST-MAG Coordinating Center, Los Angeles, CA |
| Tone        | Barbara      | FAST-MAG Coordinating Center, Los Angeles, CA |
| Valenti     | Kathy        | FAST-MAG Coordinating Center, Los Angeles, CA |
| Venturo     | Ana Cecilia  | FAST-MAG Coordinating Center, Los Angeles, CA |
| Yanes       | Anna         | FAST-MAG Coordinating Center, Los Angeles, CA |

---

The FAST-MAG Clinical Trial Research Assistants

---

|           |          |                                               |
|-----------|----------|-----------------------------------------------|
| Cho       | Michelle | FAST-MAG Coordinating Center, Los Angeles, CA |
| Filip     | Bogdan   | FAST-MAG Coordinating Center, Los Angeles, CA |
| Fong      | Mimi     | FAST-MAG Coordinating Center, Los Angeles, CA |
| Manuweera | Dilanga  | FAST-MAG Coordinating Center, Los Angeles, CA |
| Lee       | Michael  | FAST-MAG Coordinating Center, Los Angeles, CA |
| Leeper    | Denise   | FAST-MAG Coordinating Center, Los Angeles, CA |
| Rebhan    | David    | FAST-MAG Coordinating Center, Los Angeles, CA |
| Rideout   | Emma     | FAST-MAG Coordinating Center, Los Angeles, CA |
| Santiago  | Luis     | FAST-MAG Coordinating Center, Los Angeles, CA |
| Swendsen  | Heavenly | FAST-MAG Coordinating Center, Los Angeles, CA |

---
